# Supplementary material for: Above-room-temperature switching of quadratic nonlinear optical properties in a Bi–halide organic–inorganic hybrid
Source: Royal Society of Chemistry journal article supplement (doi:10.1039/c8tc02791a), 2018-01-01
Supplement: c8tc02791a1.pdf [file c8tc02791a1.pdf]

## Supporting information

### **Above-room-temperature switching of quadratic nonlinear optical properties in a Bi-halide organic-inorganic hybrid**

Zhenyue Wu,<sup>a,b</sup> Xitao Liu,<sup>a</sup> Chengmin Ji,<sup>a</sup> Lina Li,<sup>a</sup> Sasa Wang,<sup>a,b</sup> Zhihua Sun,<sup>a,\*</sup> Weichuan Zhang,<sup>a</sup> Yu Peng,<sup>a,b</sup> Junhua Luo<sup>a,\*</sup>

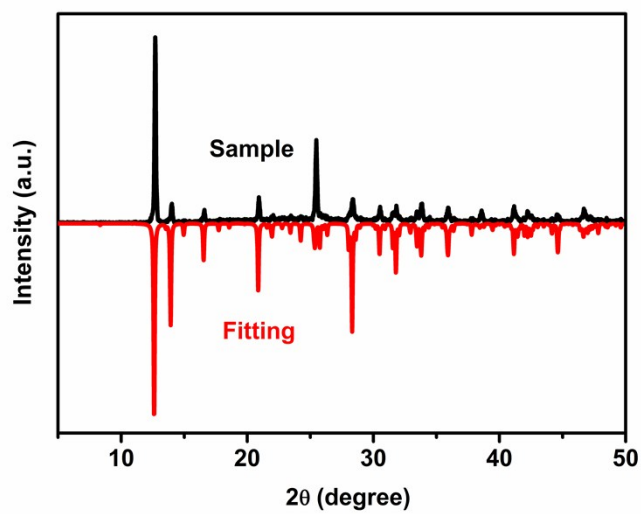

**Figure S1:** Powder X-ray diffraction patterns of experimental and calculated of **1**.

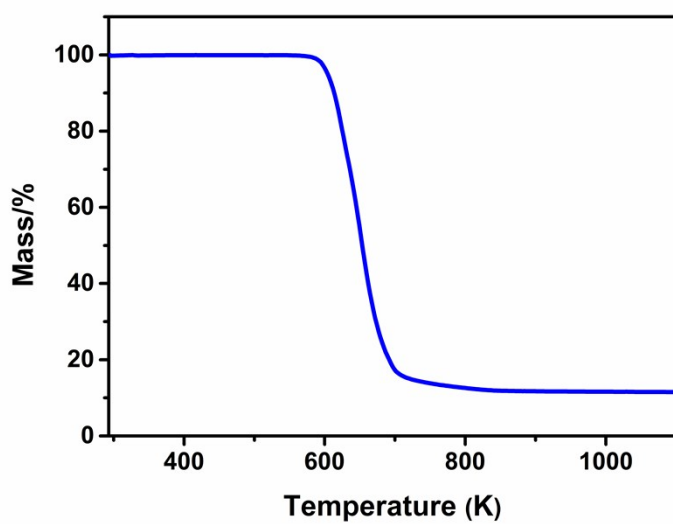

**Figure S2:** The TG curves of **1**. This compound can maintain the thermal stable up to 580 K.

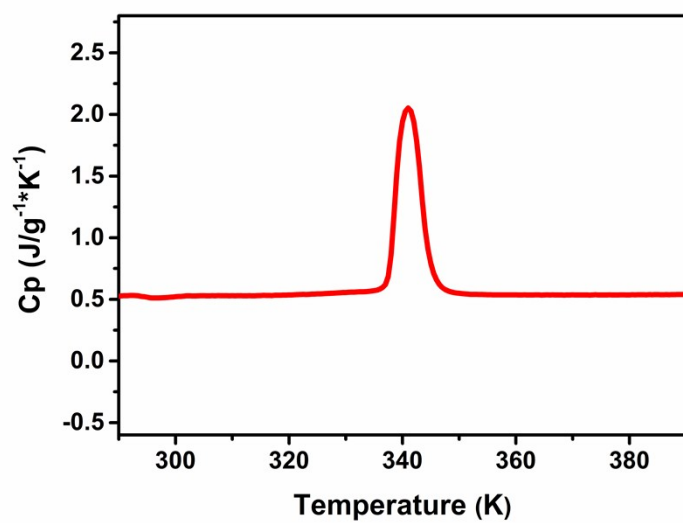

**Figure S3:** Temperature dependence of  $C_p$  curve of **1**.

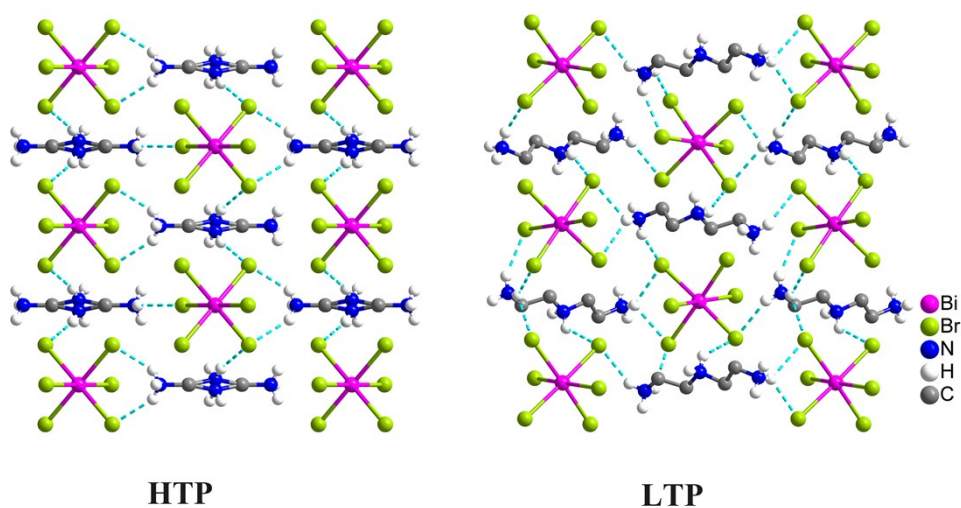

**Figure S4:** Comparison of the crystal structures of **1** at HTP and LTP. The N-H...Br hydrogen-bonding interactions between organic cations and inorganic framework in compound **1** were shown. Some hydrogen bonds were omitted for clarity.

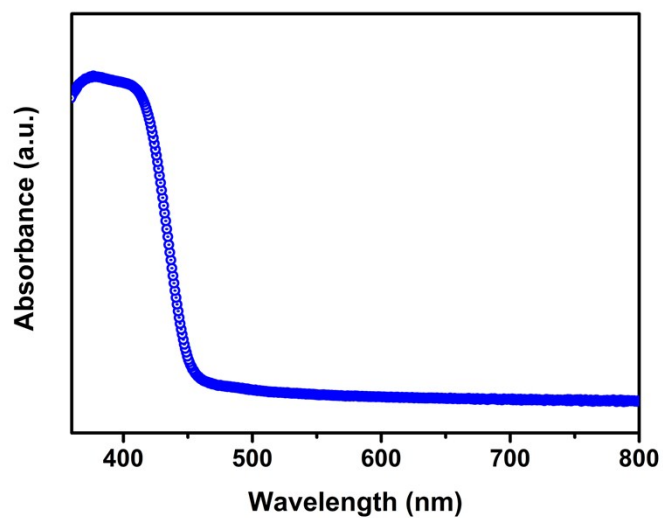

**Figure S5:** The UV/vis absorption spectrum of **1**, the absorption edge of this compound is estimated to be 455 nm.

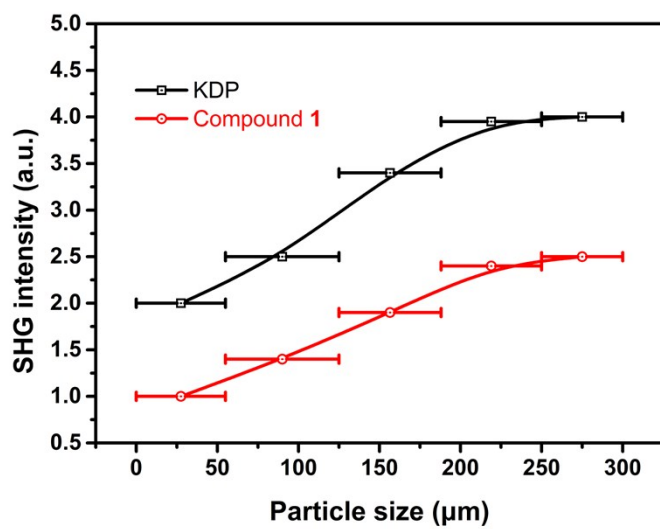

**Figure S6:** SHG intensity vs. particle size curves for **1**. KDP samples serve as the references.

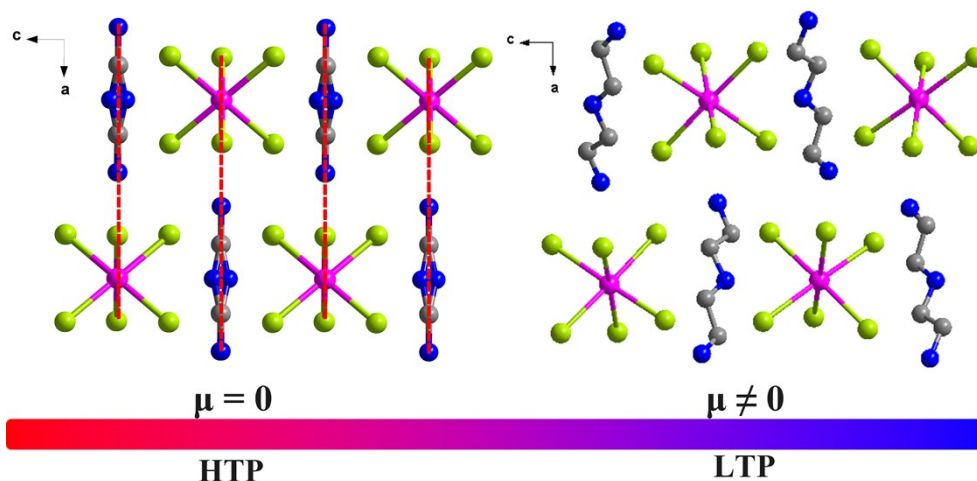

**Figure S7:** Schematic diagram for molecular dipole moments in **1** during its NLO-switching process.

**Table S1** Crystal structure and refinement detail of **1** at different temperatures.

|                                                                                                                   |                                                                    |                                                                    |
|-------------------------------------------------------------------------------------------------------------------|--------------------------------------------------------------------|--------------------------------------------------------------------|
| Empirical formula                                                                                                 | $C_4H_{16}N_3BiBr_6$                                               | $C_4H_{16}N_3BiBr_6$                                               |
| Formula weight                                                                                                    | 794.64                                                             | 794.64                                                             |
| Temperature, K                                                                                                    | 300(2)                                                             | 345(2)                                                             |
| Crystal system, space group                                                                                       | orthorhombic, $P2_12_12_1$                                         | orthorhombic, $Pnmm$                                               |
| $a$ , Å                                                                                                           | 14.0146(2)                                                         | 13.8796(9)                                                         |
| $b$ , Å                                                                                                           | 7.15630(10)                                                        | 7.3670(5)                                                          |
| $c$ , Å                                                                                                           | 16.2662(2)                                                         | 8.0696(6)                                                          |
| $\alpha$ , deg                                                                                                    | 90                                                                 | 90                                                                 |
| $\beta$ , deg                                                                                                     | 90                                                                 | 90                                                                 |
| $\gamma$ , deg                                                                                                    | 90                                                                 | 90                                                                 |
| $V$ , Å <sup>3</sup>                                                                                              | 1631.38(4)                                                         | 825.12(10)                                                         |
| $Z$ , Calculated density                                                                                          | 4, 3.235                                                           | 2, 3.198                                                           |
| Absorption coefficient                                                                                            | 25.479                                                             | 25.188                                                             |
| $F(000)$                                                                                                          | 1416                                                               | 708                                                                |
| Theta range, deg                                                                                                  | 2.50 to 27.49                                                      | 2.92 to 27.47                                                      |
| Limiting indices                                                                                                  | $-17 \leq h \leq 18$<br>$-9 \leq k \leq 9$<br>$-21 \leq l \leq 19$ | $-18 \leq h \leq 17$<br>$-9 \leq k \leq 9$<br>$-10 \leq l \leq 10$ |
| Reflections collected / unique                                                                                    | 11842 / 3730                                                       | 4982 / 1018                                                        |
| Completeness                                                                                                      | 99.7 %                                                             | 99.7 %                                                             |
| Data / restraints / parameters                                                                                    | 3730 / 0 / 129                                                     | 1018 / 8 / 45                                                      |
| Goodness-of-fit on $F^2$                                                                                          | 1.028                                                              | 1.081                                                              |
| Final $R$ indices [ $I > 2\sigma(I)$ ]                                                                            | $R_1 = 0.0396$ , $wR_2 = 0.1077$                                   | $R_1 = 0.0694$ , $wR_2 = 0.2051$                                   |
| $R$ indices (all data)                                                                                            | $R_1 = 0.0459$ , $wR_2 = 0.1121$                                   | $R_1 = 0.0857$ , $wR_2 = 0.2241$                                   |
| $^a R_1 = \sum   F_o  -  F_c   / \sum  F_o $ , $wR_2 = \{ \sum [w(F_o^2 - F_c^2)^2] / \sum w[(F_o)^2]^2 \}^{1/2}$ |                                                                    |                                                                    |

**Table 2:** Selected bond lengths [Å] and angles [deg] of **1** in HTP and LTP.

| HTP                   |            | LTP               |            |
|-----------------------|------------|-------------------|------------|
| Bi(1)-Br(1)           | 2.841(3)   | Bi(1)-Br(5)       | 2.7809(13) |
| Bi(1)-Br(1)#1         | 2.841(3)   | Bi(1)-Br(1)       | 2.7996(10) |
| Bi(1)-Br(2)           | 2.8599(14) | Bi(1)-Br(4)       | 2.8588(12) |
| Bi(1)-Br(2)#2         | 2.8599(14) | Bi(1)-Br(2)       | 2.8761(11) |
| Bi(1)-Br(2)#3         | 2.8599(14) | Bi(1)-Br(6)       | 2.9048(12) |
| Bi(1)-Br(2)#1         | 2.8599(14) | Bi(1)-Br(3)       | 2.9454(11) |
| Br(1)-Bi(1)-Br(2)     | 91.65(7)   | Br(5)-Bi(1)-Br(1) | 88.70(4)   |
| Br(1)#1-Bi(1)-Br(2)   | 88.35(7)   | Br(5)-Bi(1)-Br(4) | 90.94(5)   |
| Br(1)-Bi(1)-Br(2)#2   | 91.65(7)   | Br(1)-Bi(1)-Br(4) | 89.90(3)   |
| Br(1)#1-Bi(1)-Br(2)#2 | 88.35(7)   | Br(5)-Bi(1)-Br(2) | 87.44(4)   |
| Br(2)-Bi(1)-Br(2)#2   | 89.63(7)   | Br(1)-Bi(1)-Br(2) | 91.25(3)   |
| Br(1)-Bi(1)-Br(2)#3   | 88.35(7)   | Br(1)-Bi(1)-Br(6) | 84.92(3)   |
| Br(1)#1-Bi(1)-Br(2)#3 | 91.65(7)   | Br(4)-Bi(1)-Br(6) | 95.50(4)   |
| Br(2)-Bi(1)-Br(2)#3   | 90.37(7)   | Br(2)-Bi(1)-Br(6) | 86.24(4)   |
| Br(1)-Bi(1)-Br(2)#1   | 88.35(7)   | Br(5)-Bi(1)-Br(3) | 89.96(4)   |
| Br(1)#1-Bi(1)-Br(2)#1 | 91.65(7)   | Br(4)-Bi(1)-Br(3) | 88.99(4)   |
| Br(2)#2-Bi(1)-Br(2)#1 | 90.37(7)   | Br(2)-Bi(1)-Br(3) | 89.82(3)   |
| Br(2)#3-Bi(1)-Br(2)#1 | 89.63(7)   | Br(6)-Bi(1)-Br(3) | 96.54(3)   |

Symmetry transformations used to generate equivalent atoms: #1 -x,-y,-z #2 x,y,-z #3 -x,-y,z #4 -x,-y+1,-z+1

### Computational methods.

The dipole moments of constituent groups in the crystal were calculated with density functional theory (DFT) and the B3LYP extended ex-change functions employing the finite field (FF) method with the GAUSSIAN 09 electronic structure package.<sup>1</sup> In order to take into account the relativistic effect, Bi atoms adopted the effective core potential (ECP) double- $\zeta$  (DZ) basic set of LanL2DZ, while the nonmetal elements took standard 6-311+G (d) all-electron basis set. Average polarizability ( $\bar{\alpha}$ ) and total intrinsic first hyperpolarizability ( $\beta_{tot}$ ) can be estimated according to the following equations:

$$\bar{\alpha} = (\alpha_{xx} + \alpha_{yy} + \alpha_{zz}) / 3$$

and

$$\beta_{tot} = [\beta_x^2 + \beta_y^2 + \beta_z^2]^{1/2}$$

where

$$\beta_i = \frac{1}{3} \sum_j [\beta_{ij} + \beta_{ji} + \beta_{ji}] \quad i = x, y, z$$

**Table S3** Calculated dipole moment (in D), linear polarizability (in  $10^{-24}$  esu) and first hyperpolarizability (in  $10^{-30}$  esu) values.

|                 | BiBr <sub>6</sub> | C <sub>4</sub> N <sub>3</sub> H <sub>16</sub> | (C <sub>4</sub> N <sub>3</sub> H <sub>16</sub> )BiBr <sub>6</sub> |
|-----------------|-------------------|-----------------------------------------------|-------------------------------------------------------------------|
| $\mu_x$         | -4.125            | 0.080                                         | -29.148                                                           |
| $\mu_y$         | 1.105             | -0.060                                        | 9.653                                                             |
| $\mu_z$         | 1.443             | 0.345                                         | 22.925                                                            |
| $u_g$           | 4.508             | 0.360                                         | 38.319                                                            |
| $\alpha_{xx}$   | 88.197            | 7.538                                         | 84.979                                                            |
| $\alpha_{xy}$   | 0.428             | -1.707                                        | -2.557                                                            |
| $\alpha_{yy}$   | 89.878            | 8.511                                         | 79.710                                                            |
| $\alpha_{xz}$   | 1.453             | -0.418                                        | -10.455                                                           |
| $\alpha_{yz}$   | -0.930            | 0.133                                         | -0.357                                                            |
| $\alpha_{zz}$   | 91.451            | 6.343                                         | 87.038                                                            |
| $\alpha_{tot}$  | 89.842            | 7.464                                         | 83.909                                                            |
| $\beta_{xxx}$   | 16.387            | 0.022                                         | 3.464                                                             |
| $\beta_{xxy}$   | -1.584            | 0.015                                         | -4.672                                                            |
| $\beta_{xyy}$   | 3.158             | -0.005                                        | -0.102                                                            |
| $\beta_{yyy}$   | 7.426             | 0.013                                         | -3.944                                                            |
| $\beta_{zxx}$   | 4.667             | 0.009                                         | -6.759                                                            |
| $\beta_{xyz}$   | -1.171            | -0.001                                        | 3.453                                                             |
| $\beta_{zyy}$   | 0.386             | 0.022                                         | -2.055                                                            |
| $\beta_{xzz}$   | 2.240             | -0.025                                        | 4.890                                                             |
| $\beta_{yzz}$   | 4.544             | -0.006                                        | -0.153                                                            |
| $\beta_{zzz}$   | -7.369            | 0.011                                         | -0.222                                                            |
| $\beta_{total}$ | 24.244            | 0.048                                         | 15.056                                                            |

1. Frisch MJ, Trucks GW, Schlegel HB, Scuseria GE, Robb MA, Cheeseman JR, et al. Gaussian 09. Revision A. 02 ed. Wallingford, CT: Gaussian, Inc.; 2009. p. 271.
